# Supplementary material for: Pharmacological activation of the circadian component REV-ERB inhibits HIV-1 replication
Source: PubMed Central journal article supplement (PMC7413328; doi:10.1038/s41598-020-70170-3), 2020-08-06
Supplement: 41598_2020_70170_MOESM1_ESM.pdf [file 41598_2020_70170_MOESM1_ESM.pdf]

SUPPLEMENTARY MATERIALS for MS:

**Pharmacological activation of the circadian component REV-ERB inhibits HIV-1 replication**

Helene Borrmann<sup>1\*</sup>, Rhianna Davies<sup>2\*</sup>, Matthew Dickinson<sup>1</sup>, Isabela Pedroza-Pacheco<sup>1</sup>,  
Mirjam Schilling<sup>1</sup>, Alun Vaughan-Jackson<sup>3</sup>, Andrea Magri<sup>1</sup>, William James<sup>3</sup>, Peter Balfe<sup>1</sup>  
Persephone Borrow<sup>1</sup>, Jane A McKeating<sup>1</sup> and Xiaodong Zhuang<sup>1\*\*</sup>

1 – Nuffield Department of Clinical Medicine, University of Oxford, OX3 7FZ, UK.

2 – Institute of Immunity and Immunotherapy, University of Birmingham, B15 2TT. UK.

3 – Sir William Dunn School of Pathology, University of Oxford, OX1 3RE

\*Shared first authorship

\*\* Corresponding author: [xiaodong.zhuang@ndm.ox.ac.uk](mailto:xiaodong.zhuang@ndm.ox.ac.uk)

## Supplementary figure 1

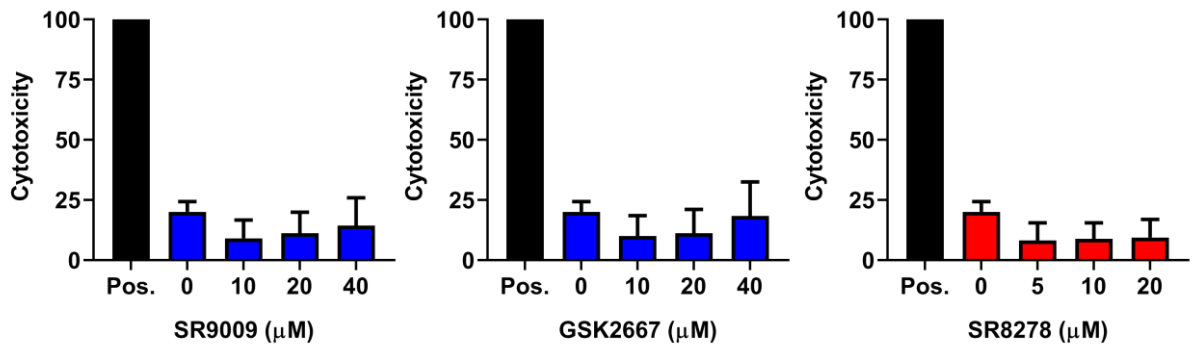

**SFig.1 Lack of cytotoxicity of REV-ERB ligands for T2M-bl cells.** T2M-bl cells were treated with REV-ERB agonists SR9009 or GSK2667 or the antagonist SR8278 at a range of doses for 24h and cytotoxicity determined using an LDH assay (mean  $\pm$  S.E.M., n = 2). Data are expressed relative to the positive control representing total cell lysate (100% cytotoxicity).

## Supplementary figure 2

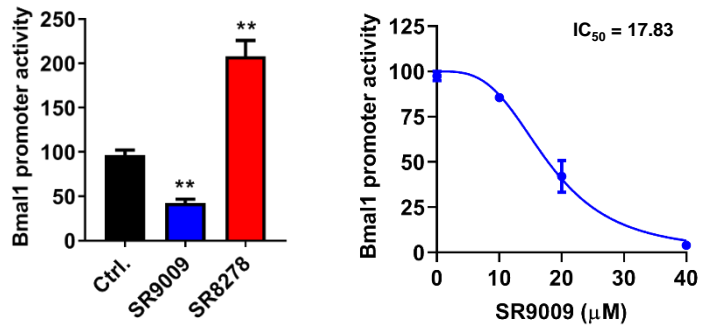

**SFig.2 Effect of REV-ERB ligands on Bmal1 promoter activity in Jurkat cells.** Jurkat cells stably expressing a Bmal1 promoter-luciferase construct were treated with the REV-ERB agonist SR9009 (20 μM) or antagonist SR8278 (20 μM) and luciferase activity measured after 24h (mean ± S.E.M., n = 3, One-way ANOVA). The IC<sub>50</sub> of SR9009 was determined at 24h post treatment by quantifying luciferase activity.

### Supplementary figure 3

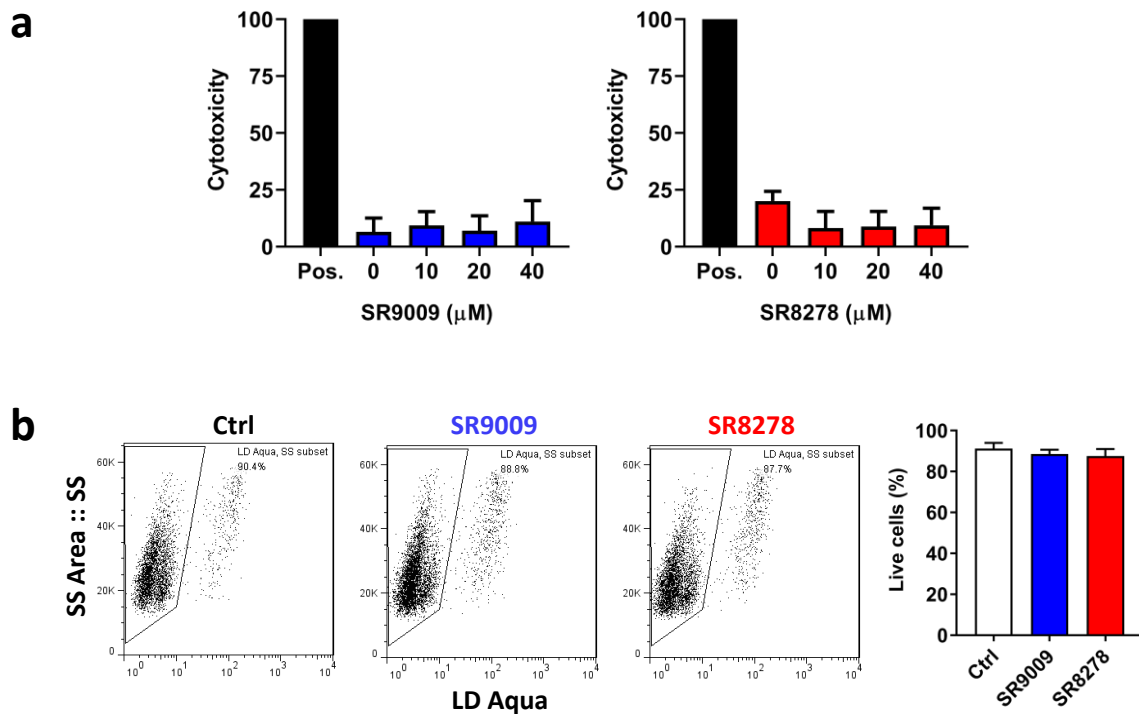

**SFig.3 Lack of cytotoxicity of REV-ERB ligands for Jurkat cells. (a)** Jurkat cells were treated with the REV-ERB agonist SR9009 or antagonist SR8278 at a range of doses for 24h and cytotoxicity determined using an LDH assay (mean  $\pm$  S.E.M.,  $n = 2$ ). Data are expressed relative to a positive control representing total cell lysate (100% cytotoxicity). **(b)** Jurkat cells were treated with the REV-ERB agonist SR9009 or antagonist SR8278 for 24h or medium only as a negative control, and viability assessed by flow cytometry using a live-dead stain. Dot plots illustrate staining of one representative biological sample and summary plots of the percentage of live cells are shown on the right ( $n=7$ , mean + S.E.M., One-way ANOVA).

## Supplementary figure 4

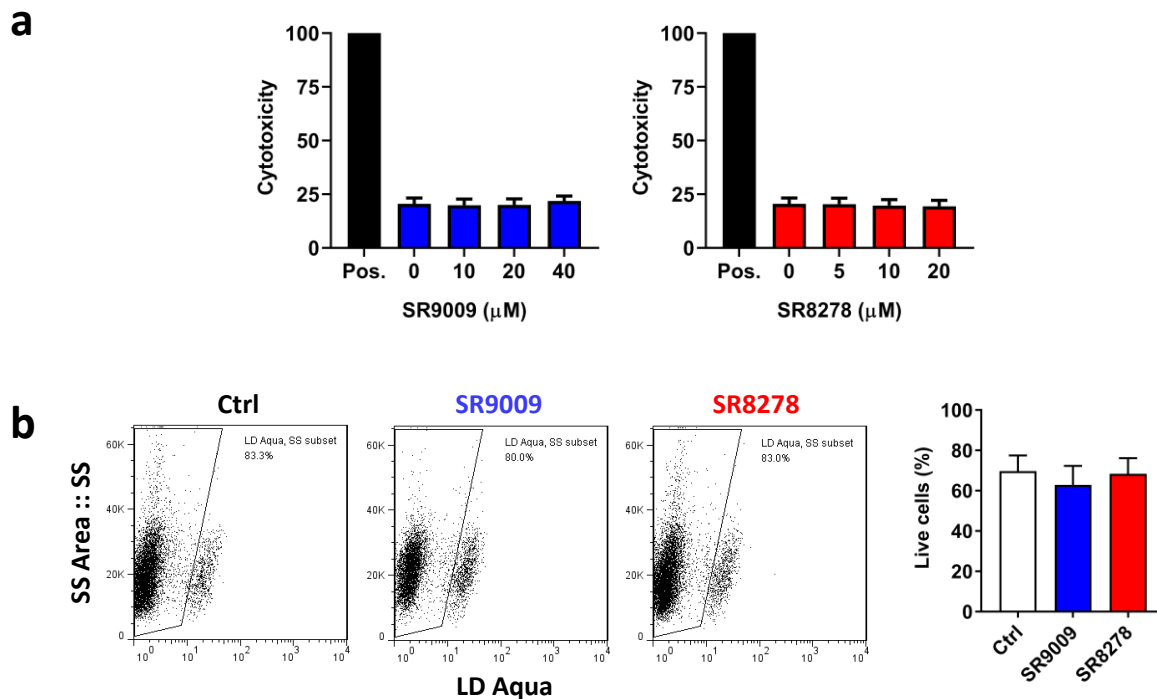

**SFig.4 Lack of cytotoxicity of REV-ERB ligands for human primary CD4 T cells.** Primary human CD4 T cells were activated with anti-CD3/CD28 for 3 days and treated with the REV-ERB agonist SR9009 or antagonist SR8278 at a range of doses for 24h and cytotoxicity determined using an LDH assay (mean  $\pm$  S.E.M.,  $n = 3$ ). Data are expressed relative to the positive control representing total cell lysate (100% cytotoxicity). **(b)** Activated CD4 T cells were treated with the REV-ERB agonist SR9009 or antagonist SR8278 for 24h or medium only as a negative control, and cell viability assessed by flow cytometry using a live-dead stain. Dot plots illustrates staining of one representative biological sample and summary plots of the percentage of live cells are shown on the right ( $n=7$ , mean + S.E.M., One-way ANOVA).

## Supplementary figure 5

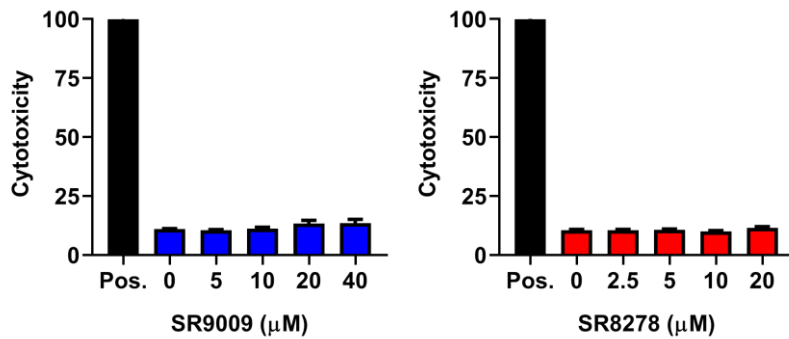

**SFig.5 Lack of cytotoxicity of REV-ERB ligands for human induced pluripotent stem cells (iPSCs) derived macrophages.** Human iPSCs-derived macrophages were treated with the REV-ERB agonist SR9009 or antagonist SR8278 at a range of doses for 24h and cytotoxicity determined using a LDH assay (mean  $\pm$  S.E.M., n = 3). Data are expressed relative to the positive control representing total cell lysate (100% cytotoxicity).

## Supplementary figure 6

### ROR response element (Start 412 bp)

```
*****  
LAI-B ] CCATCCAAAGGTCAGTGGATAT  
93UG66-A ] CCATCCAAAGGTCAGTGGATAT  
93ZM74-C ] CCATCCAAAGGTCAGTGGATAT  
94ZR80-D ] CCATCCAAAGGTCAGTGGATAT  
97TH87-E ] CCATCCAAAGGTCAGTGGATAT  
93BR020-F ] CCATCCAAAGGTCAGTGGATAT  
93CB76-G ] CCATCCAAAGGTCAGTGGATAT
```

### Glucocorticoid receptor elements (start: 343 bp)

```
*****  
LAI-B ] CAAGCTGGTGTTCCTCCTTTA  
93UG66-A ] AAAGCTGGTGTTCCTCCTTTA  
93ZM74-C ] CAAGCTGGTGTTCCTCCTTTA  
94ZR80-D ] CAAGCTGGTGTTCCTCCTTTA  
97TH87-E ] CAAGCTGGTGTTCCTCCTTTA  
93BR020-F ] CAAGCTGGTGTTCCTCCTTTA  
93CB76-G ] CAAGCTGGTGTTCCTCCTTTA
```

SFig.6 Conserved ROR response element and glucocorticoid receptor element in the HIV-1 LTR.

## Supplementary figure 7

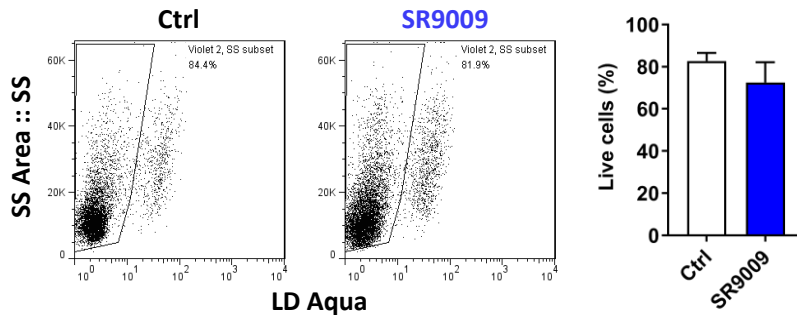

**SFig.7 Viability of peripheral blood mononuclear cells (PBMCs) following extended treatment with SR9009.** Human PBMCs were depleted of CD8 T cells and activated by culture with antibodies to CD3 and CD28 for 3 days, then infected with HIV-1 and cultured in medium with or without SR9009 (20  $\mu$ M) for a further 7 days. The first biological repeat employed cells from a single HIV-seronegative donor, whilst repeats two and three employed cells pooled from three healthy donors. Cell viability was assessed by flow cytometry using a live-dead stain on day 7 post SR9009 treatment. Dot plots illustrate staining of one representative biological sample and summary plots of the percentage of live cells are shown on the right (n=3, mean + S.E.M., paired t test).
